# Supplementary material
Source: PubMed Central journal article supplement (PMC9563935)

# Gestational diabetes contour-enhanced funnel plot

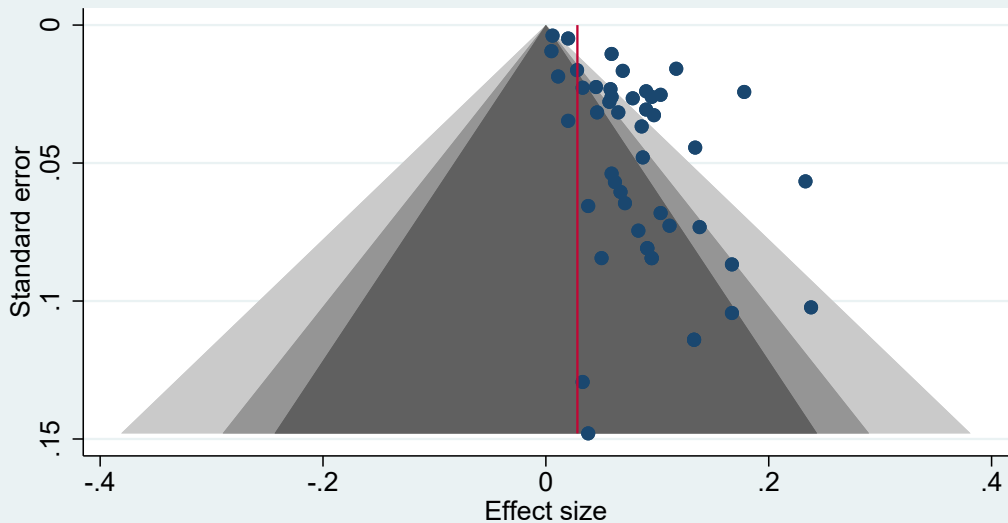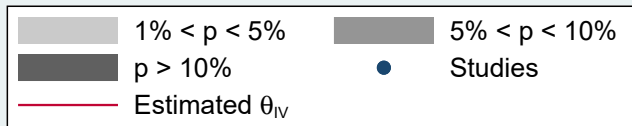

# Preeclampsia contour-enhanced funnel plot

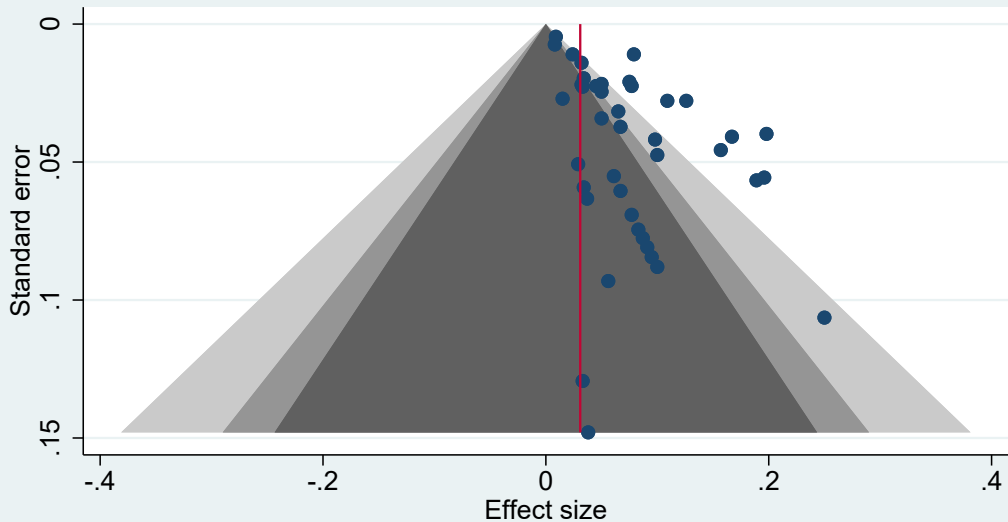

# Maternal ICU Admission contour-enhanced funnel plot

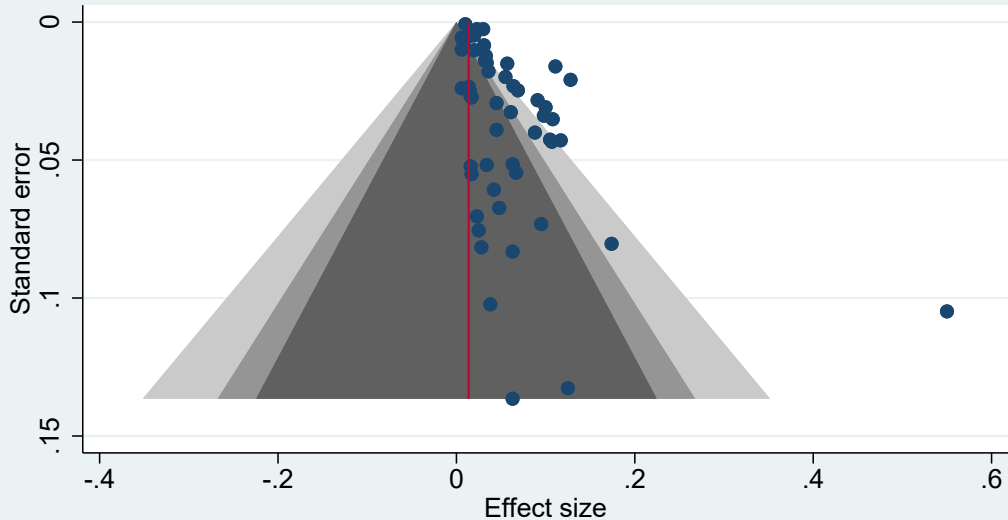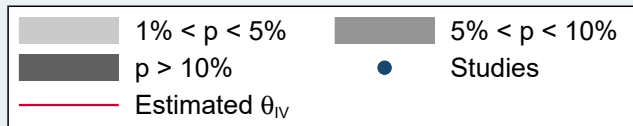

# Spontaneous vaginal deliver funnel plot

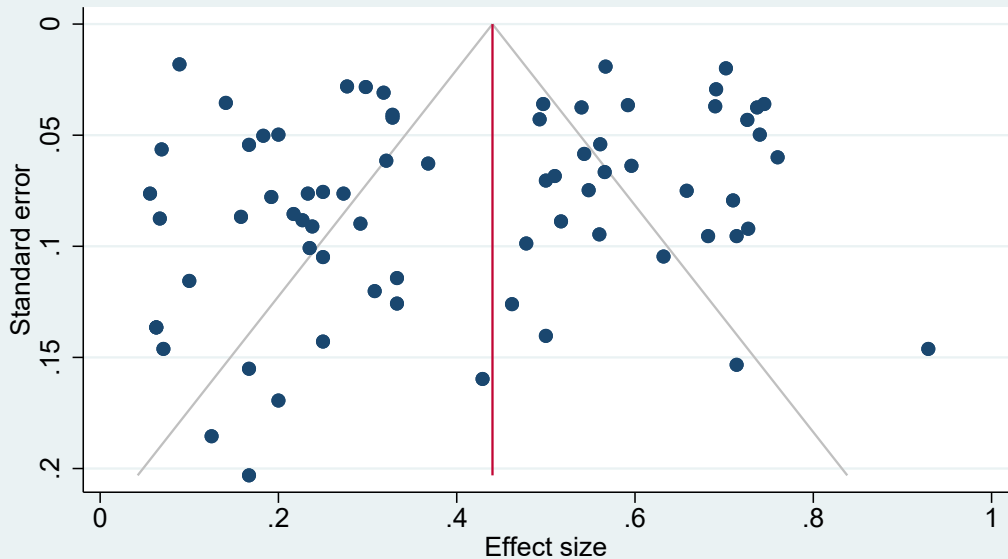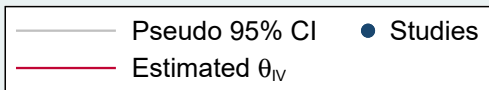

# Caesarean section funnel plot

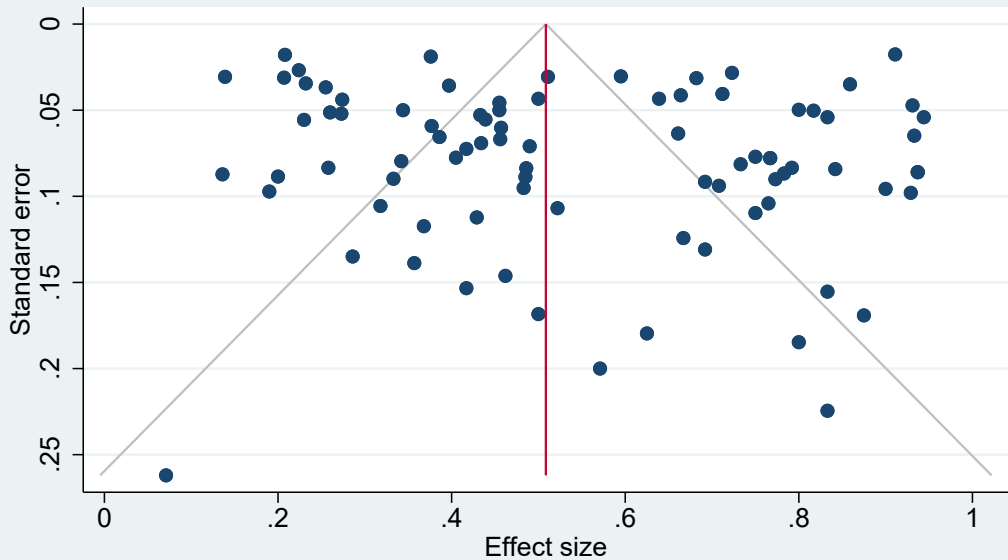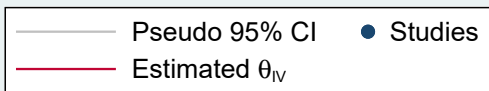

# Premature delivery funnel plot

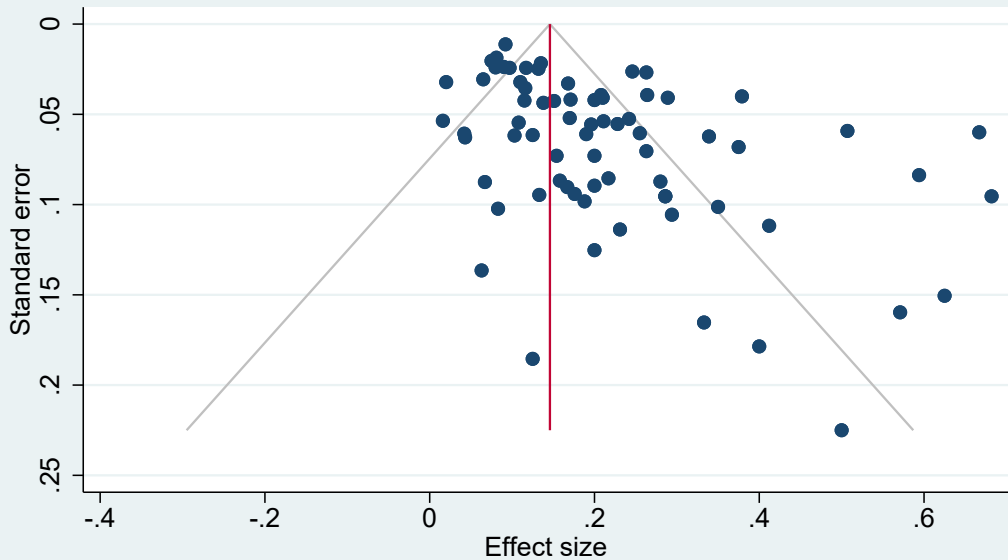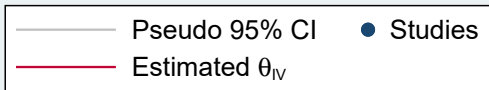

# Neonatal weight (in grams) funnel plot

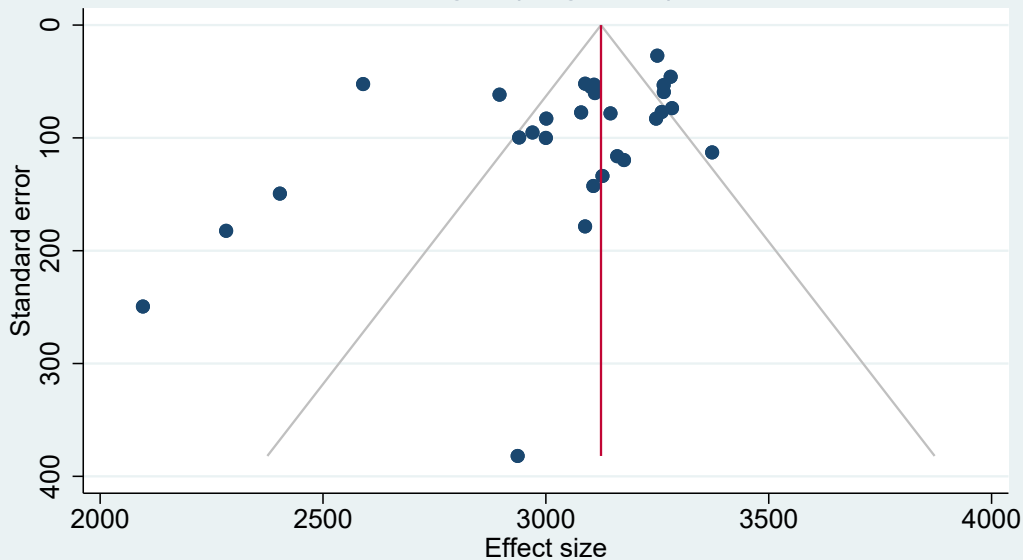

# Neonatal ICU admission funnel plot

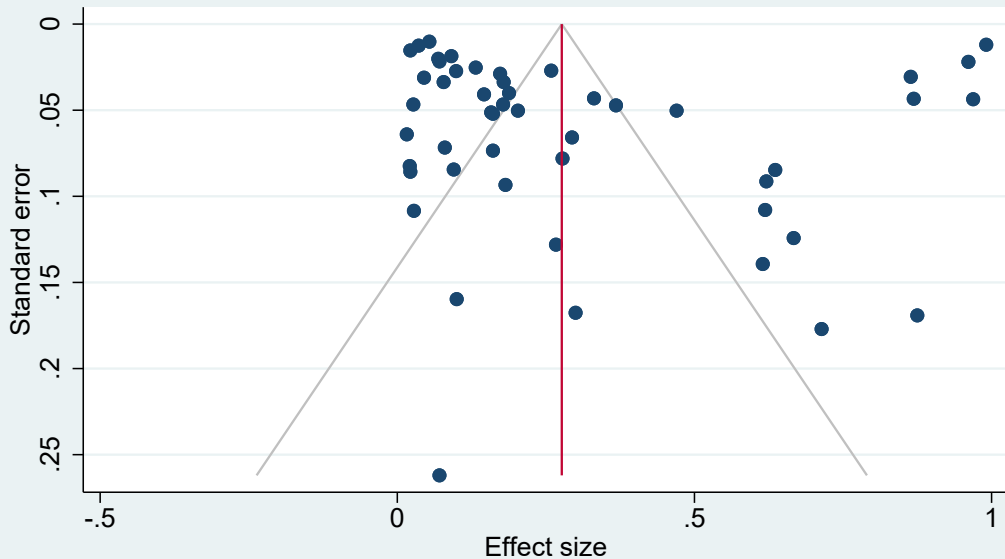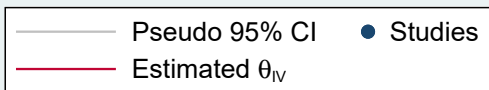



# Neonatal Mortality contour-enhanced funnel plot

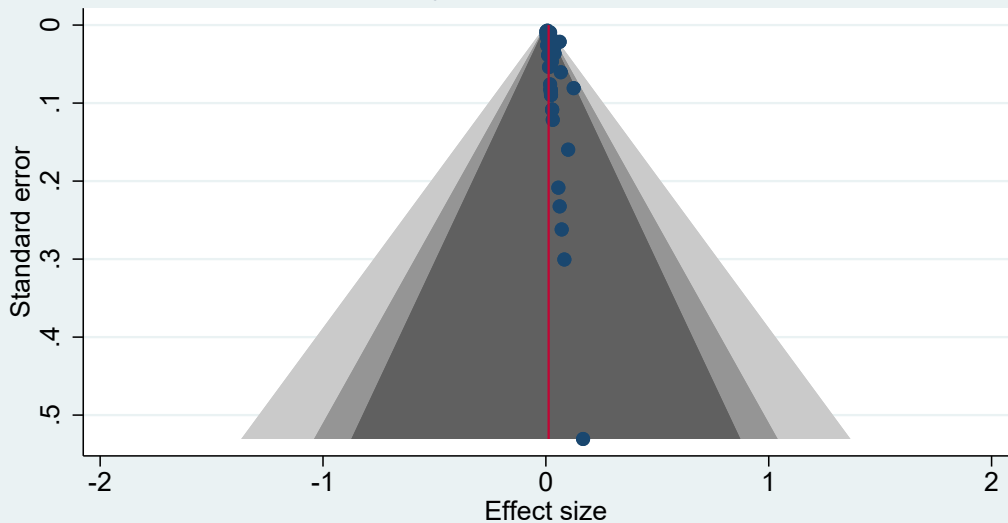

# Stillbirth contour-enhanced funnel plot

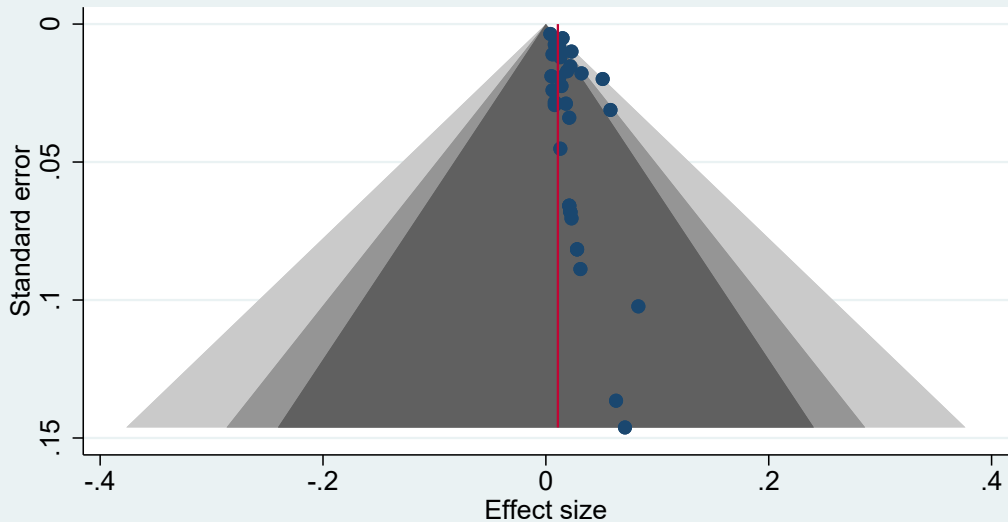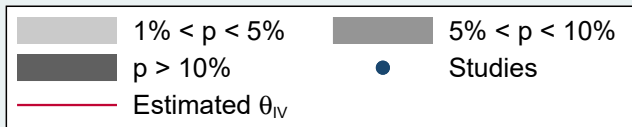

# Vertical Transmission contour-enhanced funnel plot

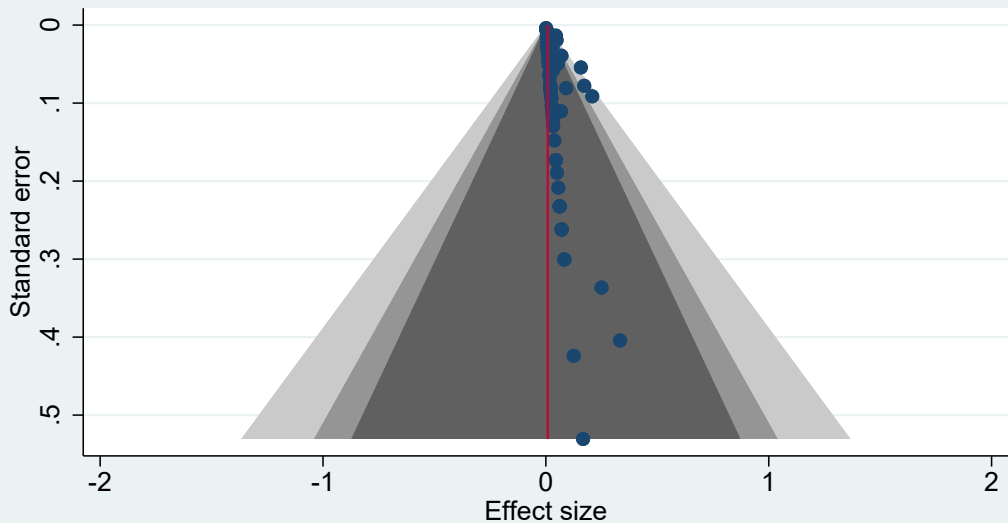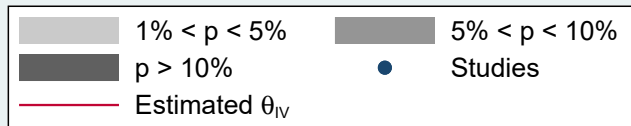

Supplement: mmc2.pdf [file mmc2.pdf]
